# Supplementary material for: Investigation of the room temperature gas sensing properties of metal–organic charge transfer complex CuTCNQF4
Source: Royal Society of Chemistry journal article supplement (doi:10.1039/c6tc03548e), 2016-01-01
Supplement: c6tc03548e1.pdf [file c6tc03548e1.pdf]

***J. Mater. Chem. C***

***Supplementary Information***

**Investigation of the Room Temperature Gas Sensing Properties of Metal-Organic Charge Transfer Complex CuTCNQF<sub>4</sub>**

Faegheh Hoshyargar,<sup>a,†</sup> Mahnaz Shafiei,<sup>a,b,†</sup> Carlo Piloto,<sup>a,b</sup> Nunzio Motta,<sup>a,b</sup> and Anthony P.

O'Mullane<sup>\*,a</sup>

<sup>a</sup> School of Chemistry, Physics and Mechanical Engineering, Queensland University of Technology (QUT), Brisbane QLD 4001, Australia

<sup>b</sup> Institute for Future Environments, Queensland University of Technology (QUT), Brisbane QLD 4001, Australia

\* Correspondence to: [anthony.omullane@qut.edu.au](mailto:anthony.omullane@qut.edu.au).

† Faegheh Hoshyargar and Mahnaz Shafiei contributed equally.

**As-deposited CuTCNF<sub>4</sub> on alumina substrate**

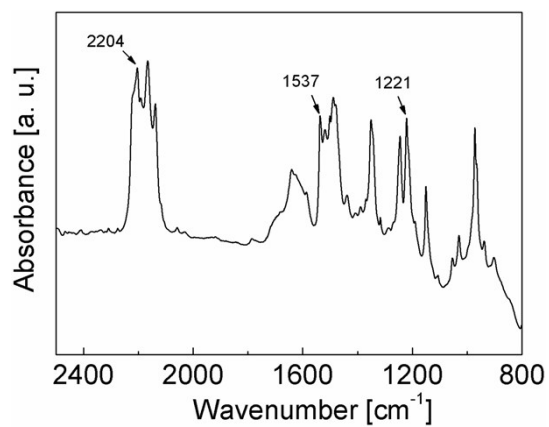

**Fig. S1** FT-IR spectrum of as-deposited CuTCNQF<sub>4</sub> film.

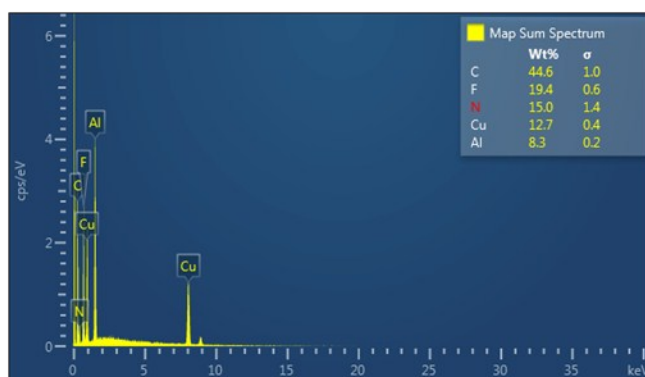

**Fig. S2** EDX analysis of as-deposited CuTCNQF<sub>4</sub> film on alumina substrate.

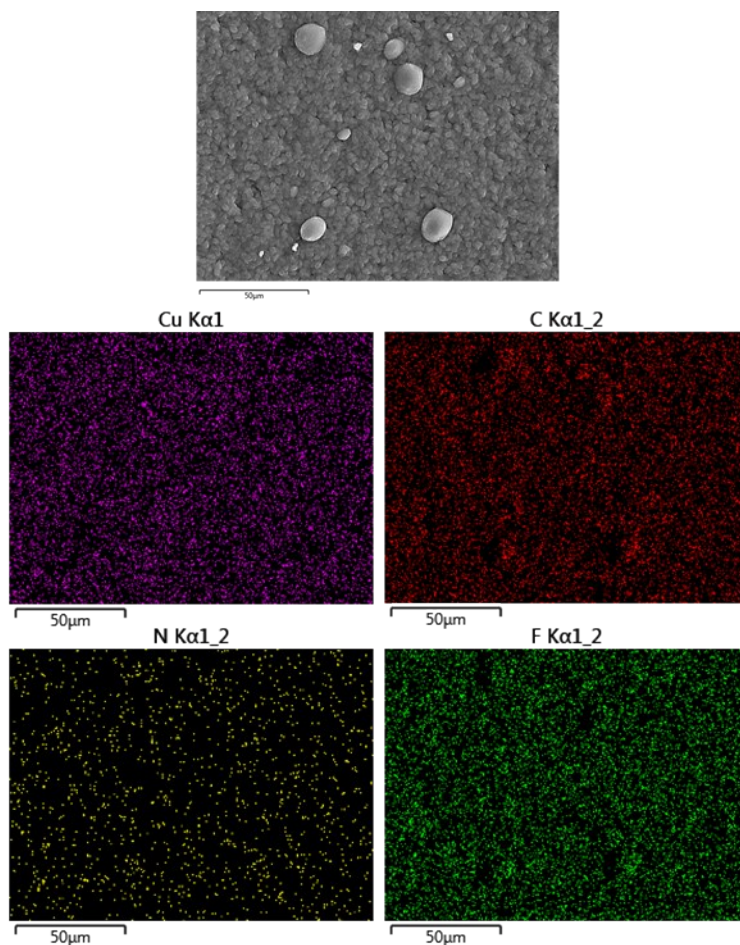

**Fig. S3** SEM image and EDX mapping of as-deposited CuTCNQF<sub>4</sub> film on alumina substrate.

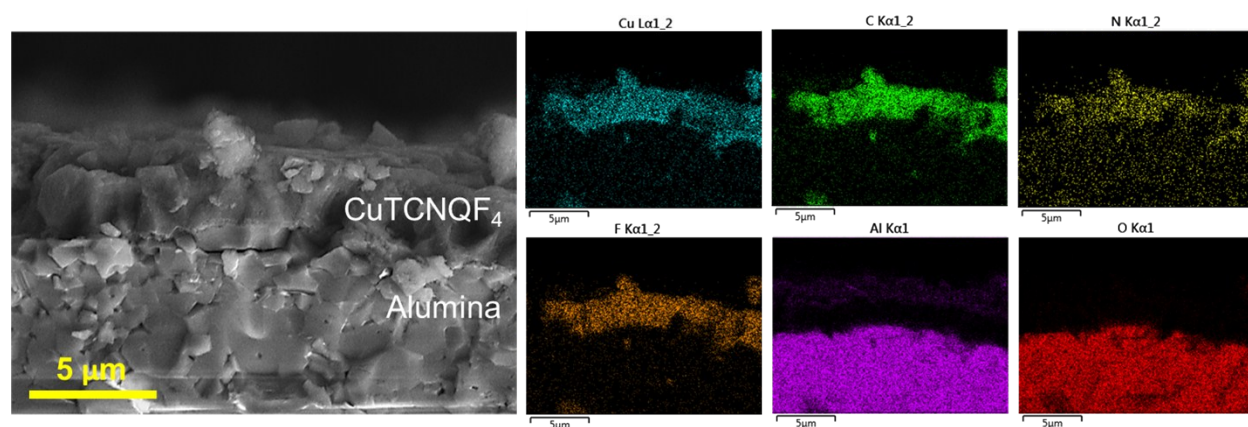

**Fig. S4** SEM cross sectional image and EDX mapping of as deposited CuTCNQF<sub>4</sub> on alumina substrate.

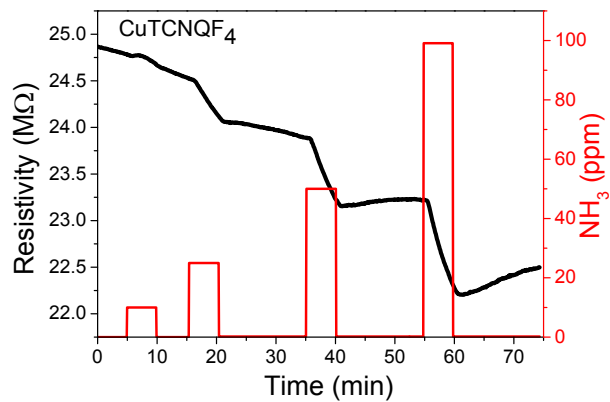

**Fig. S5** Dynamic response of as-deposited CuTCNQF<sub>4</sub> film on alumina substrate towards NH<sub>3</sub> with different concentrations at 25°C.

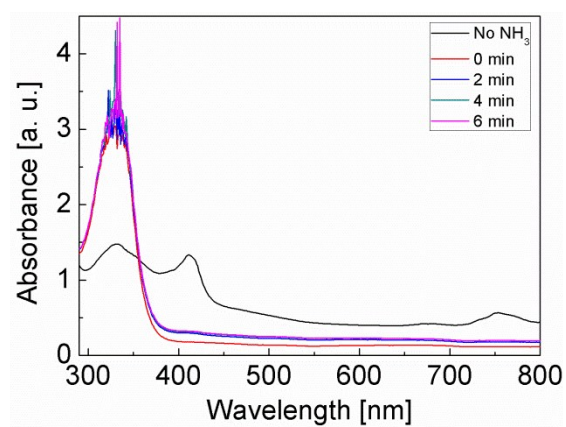

**Fig. S6** Successive UV-vis absorption spectra of a solution obtained by dissolving CuTCNQF<sub>4</sub> in acetonitrile after adding NH<sub>3</sub> to the solution.

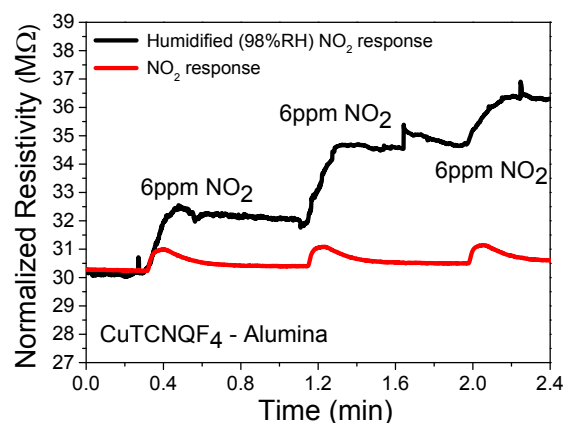

**Fig. S7** Dynamic response of as-deposited CuTCNQF<sub>4</sub> film on alumina substrate towards dry and humidified NO<sub>2</sub> gas with 6 ppm concentration at 25°C.

#### As-deposited CuTCNF<sub>4</sub>-Pt on alumina substrate

The CuTCNQF<sub>4</sub> film on the alumina substrate was decorated with Pt NPs via a simple galvanic replacement process. This approach was used previously to decorate CuTCNQ structures with Pt and Au nanoparticles and the galvanic replacement mechanism has been characterised in detail.<sup>1-3</sup> In a typical experiment, CuTCNQF<sub>4</sub> films were immersed in an aqueous solution of 1 mM K<sub>2</sub>PtCl<sub>4</sub> for 18 h. Under these conditions there is enough thermodynamic driving force for CuTCNQF<sub>4</sub> to be oxidised to Cu<sup>+</sup> and TCNQF<sub>4</sub><sup>0</sup>, donating electrons to the PtCl<sub>4</sub><sup>2-</sup> ions to form Pt nanoparticles on the surface of the film. Any neutral TCNQF<sub>4</sub> would then react with Cu generated via the disproportionation of Cu<sup>+</sup> in water to Cu<sup>0</sup> and Cu<sup>2+</sup> ions to regenerate CuTCNQF<sub>4</sub> via the reaction of Cu<sup>0</sup> and TCNQF<sub>4</sub><sup>0</sup>, and therefore create a Pt decorated CuTCNQF<sub>4</sub> surface which is analogous to the metal nanoparticle decorated CuTCNQ system.<sup>2</sup>

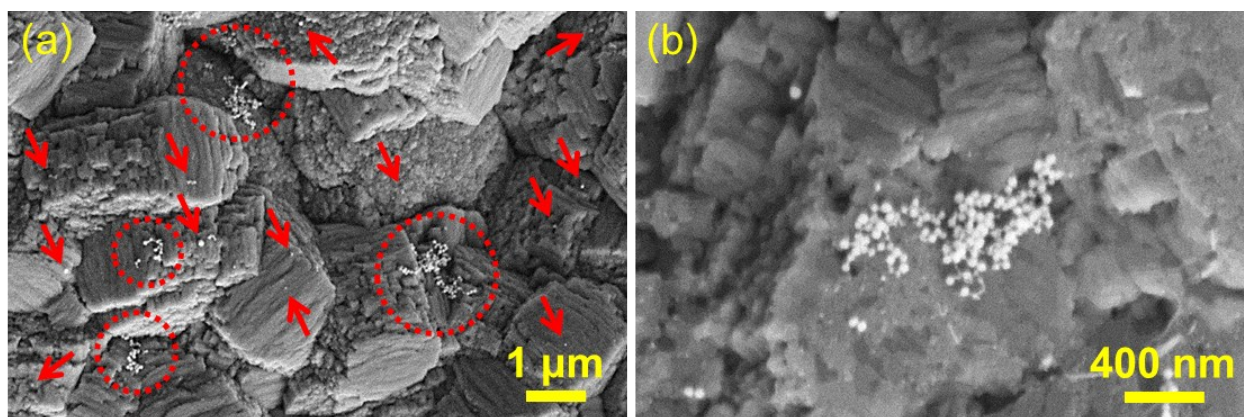

**Fig. S8** (a) Overview and (b) higher resolution FESEM images of as-deposited CuTCNQF<sub>4</sub>-Pt composite film. Arrows in (a) show the location of the Pt nanoparticles.

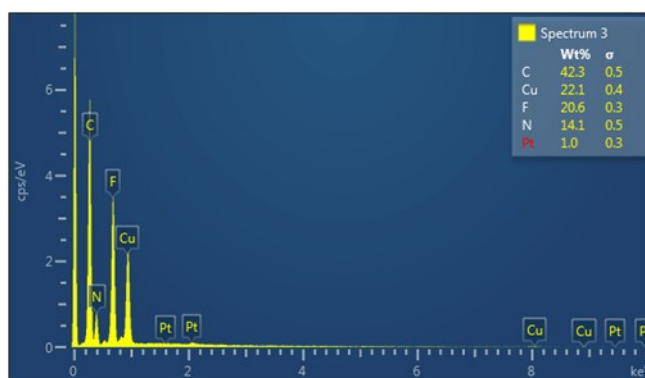

**Fig. S9** EDX analysis of CuTCNQF<sub>4</sub>-Pt film.



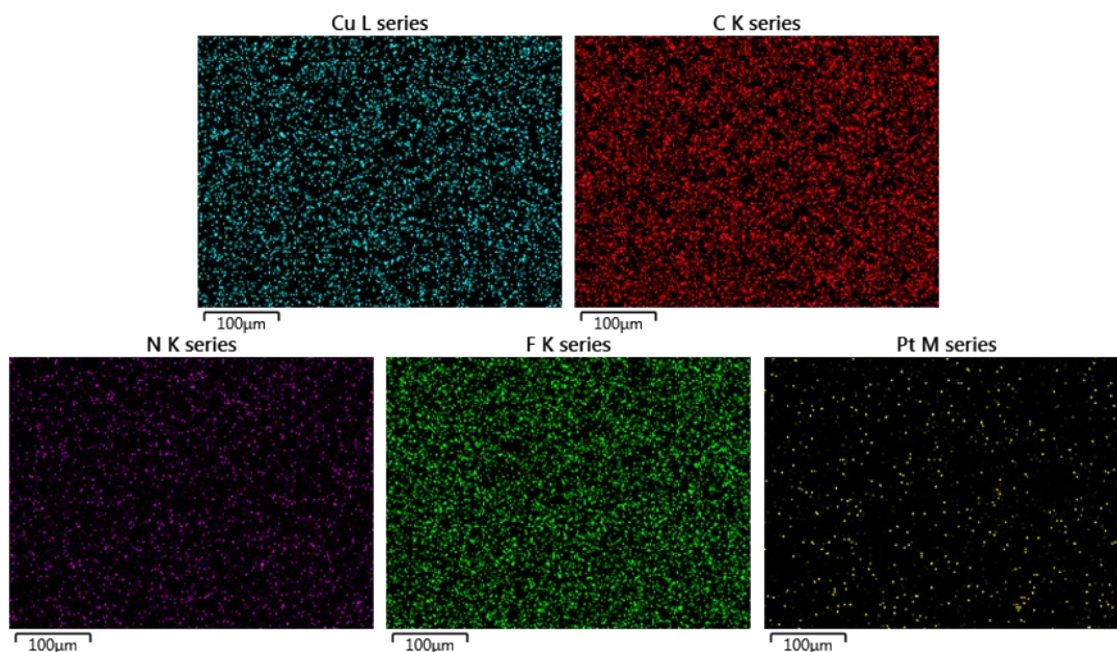

**Fig. S10** EDX mapping of CuTCNQF<sub>4</sub>-Pt film.

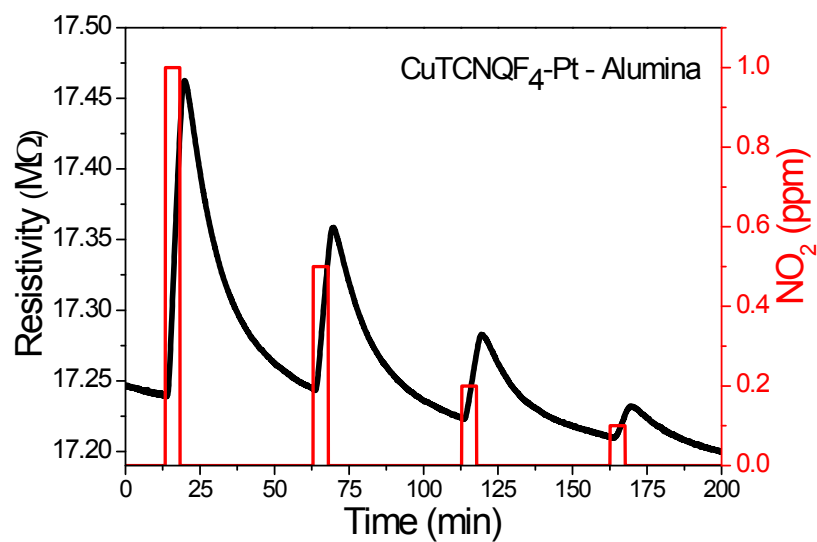

**Fig. S11** Dynamic response of the as-deposited CuTCNQF<sub>4</sub>-Pt film on alumina substrate towards NO<sub>2</sub> with concentrations in the range of 0.1-1 ppm at 25°C.

**Table S1.** Comparison between responses of as-deposited CuTCNQF<sub>4</sub> and CuTCNQF<sub>4</sub>-Pt films on alumina substrate towards NO<sub>2</sub> at 25°C.

|                          | Response to NO <sub>2</sub> (%) |          |         |       |
|--------------------------|---------------------------------|----------|---------|-------|
|                          | 0.1 ppm                         | 0.25 ppm | 0.5 ppm | 1 ppm |
| CuTCNQF <sub>4</sub>     | 0.133                           | 0.27     | 0.51    | 0.99  |
| CuTCNQF <sub>4</sub> -Pt | 0.12                            | 0.34     | 0.66    | 1.23  |

## References

1. A. Pearson and A. P. O'Mullane, *ChemPlusChem*, 2013, **78**, 1343-1348.
2. A. Pearson, A. P. O'Mullane, S. K. Bhargava and V. Bansal, *Inorg. Chem.*, 2012, **51**, 8791-8801.
3. A. Pearson, A. P. O'Mullane, V. Bansal and S. K. Bhargava, *Inorg. Chem.*, 2011, **50**, 1705-1712.
